# Supplementary material for: TLR Accessory Molecule RP105 (CD180) Is Involved in Post-Interventional Vascular Remodeling and Soluble RP105 Modulates Neointima Formation
Source: PubMed Central journal article supplement (PMC3699456; doi:10.1371/journal.pone.0067923), 2013-07-02

Figure S2

A

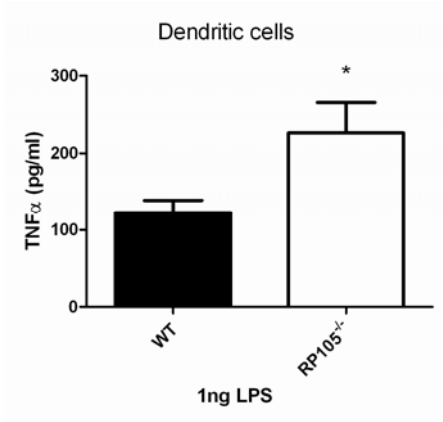

B

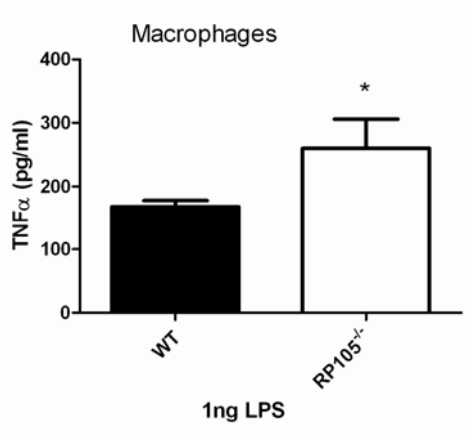

Supplement: pone.0067923.s002.pdf [file pone.0067923.s002.pdf]
